# Supplementary material
Source: ML conference proceedings conference paper supplement (https://proceedings.neurips.cc/paper_files/paper/2019/hash/6395ebd0f4b478145ecfbaf939454fa4-Abstract.html)
Supplement: Supplementary file [file 6395ebd0f4b478145ecfbaf939454fa4-Supplemental.zip]

---

# Supplementary Material of "Variational Denoising Network: Toward Blind Noise Modeling and Removal"

---

Anonymous Author(s)

Affiliation

Address

email

## Abstract

1 In this supplementary material, we provide more calculation details on the deduc-  
2 tion of the variational lower bound, and demonstrate more experimental results in  
3 blind image denoising.

## 4 1 Calculation Details on the Variational Lower Bound

### 5 1.1 Model Formation

6 Let's denote  $\mathbf{y} \in \mathbb{R}^d$  as the observed noisy image and  $\mathbf{z} \in \mathbb{R}^d$  the latent clean image. Different  
7 from most of the traditional methods, we assumed the noise is distributed as non-i.i.d. Gaussian  
8 distribution, i.e.,

$$y_i \sim \mathcal{N}(y_i|z_i, \sigma_i^2), i = 1, 2, \dots, d, \quad (1)$$

9 where  $\mathcal{N}(\cdot|\mu, \sigma^2)$  represents the Gaussian distribution with mean  $\mu$  variance  $\sigma^2$ .

10 The simulated clean image  $\mathbf{x}$  evidently provides a strong prior to the latent variable  $\mathbf{z}$ . Accordingly  
11 we impose the following conjugate Gaussian prior on  $\mathbf{z}$ :

$$z_i \sim \mathcal{N}(z_i|x_i, \varepsilon_0^2), i = 1, 2, \dots, d, \quad (2)$$

12 where  $\varepsilon_0$  is a hyper-parameter and can be easily set as a small value.

13 Besides, for  $\sigma^2 = \{\sigma_1^2, \sigma_2^2, \dots, \sigma_d^2\}$ , we also introduce a rational conjugate prior as follows:

$$\sigma_i^2 \sim \text{IG}\left(\sigma_i^2 \middle| \frac{p^2}{2} - 1, \frac{p^2 \xi_i}{2}\right), i = 1, 2, \dots, d, \quad (3)$$

14 where  $\text{IG}(\cdot|\alpha, \beta)$  is the inverse gamma distribution with parameter  $\alpha$  and  $\beta$ ,  $\xi = \mathcal{G}((\hat{\mathbf{y}} - \hat{\mathbf{x}})^2; p)$   
15 represents the filtering output of the variance map  $(\hat{\mathbf{y}} - \hat{\mathbf{x}})^2$  by a Gaussian filter with  $p \times p$  window,  
16  $\hat{\mathbf{y}}, \hat{\mathbf{x}} \in \mathbb{R}^{h \times w}$  are the matrix (image) forms of  $\mathbf{y}, \mathbf{x} \in \mathbb{R}^d$ , respectively. Note that the mode of above  
17 IG distribution is  $\xi_i$ , which is a rational approximate evaluation of  $\sigma_i^2$  under  $p \times p$  window.

18 Combining Eqs (1)-(3), a full Bayesian model for the problem can be obtained. The goal then turns  
19 to construct a variational strategy to infer the posterior of latent variables  $\mathbf{z}$  and  $\sigma^2$  from noisy image  
20  $\mathbf{y}$ , i.e.,  $p(\mathbf{z}, \sigma^2|\mathbf{y})$ .

### 21 1.2 Variational Lower Bound

22 Instead of calculating the posterior  $p(\mathbf{z}, \sigma^2|\mathbf{y})$  directly, we introduced another distribution  $q(\mathbf{z}, \sigma^2|\mathbf{y})$   
23 to approximate it. Based on such approximate distribution, we can decompose the marginal likelihood

24 of  $\mathbf{y}$  as follows:

$$\begin{aligned}
\log p(\mathbf{y}; \mathbf{z}, \sigma^2) &= \int q(\mathbf{z}, \sigma^2 | \mathbf{y}) \log p(\mathbf{y} | \mathbf{z}, \sigma^2) d\mathbf{z} d\sigma^2 \\
&= \int q(\mathbf{z}, \sigma^2 | \mathbf{y}) \log \left[ \frac{p(\mathbf{y} | \mathbf{z}, \sigma^2) p(\mathbf{z}) p(\sigma^2)}{p(\mathbf{z}, \sigma^2 | \mathbf{y})} \right] d\mathbf{z} d\sigma^2 \\
&= \int q(\mathbf{z}, \sigma^2 | \mathbf{y}) \log \left[ \frac{p(\mathbf{y} | \mathbf{z}, \sigma^2) p(\mathbf{z}) p(\sigma^2)}{q(\mathbf{z}, \sigma^2 | \mathbf{y})} + \frac{q(\mathbf{z}, \sigma^2 | \mathbf{y})}{p(\mathbf{z}, \sigma^2 | \mathbf{y})} \right] d\mathbf{z} d\sigma^2 \\
&= \int q(\mathbf{z}, \sigma^2 | \mathbf{y}) \log \left[ \frac{p(\mathbf{y} | \mathbf{z}, \sigma^2) p(\mathbf{z}) p(\sigma^2)}{q(\mathbf{z}, \sigma^2 | \mathbf{y})} \right] d\mathbf{z} d\sigma^2 \\
&\quad + \int q(\mathbf{z}, \sigma^2 | \mathbf{y}) \log \left[ \frac{q(\mathbf{z}, \sigma^2 | \mathbf{y})}{p(\mathbf{z}, \sigma^2 | \mathbf{y})} \right] d\mathbf{z} d\sigma^2 \\
&= E_{q(\mathbf{z}, \sigma^2 | \mathbf{y})} [\log p(\mathbf{y} | \mathbf{z}, \sigma^2) p(\mathbf{z}) p(\sigma^2) - \log q(\mathbf{z}, \sigma^2 | \mathbf{y})] \\
&\quad + D_{KL}(q(\mathbf{z}, \sigma^2 | \mathbf{y}) || p(\mathbf{z}, \sigma^2 | \mathbf{y})). \quad (4)
\end{aligned}$$

25 The second term is a KL divergence of the approximation  $q(\mathbf{z}, \sigma^2 | \mathbf{y})$  to the true posterior  $p(\mathbf{z}, \sigma^2 | \mathbf{y})$ ,  
26 which is non-negative, and thus the first term constitutes a *variational lower bound* on the marginal  
27 likelihood of  $p(\mathbf{y} | \mathbf{z}, \sigma^2)$ , i.e.,

$$\begin{aligned}
\log p(\mathbf{y}; \mathbf{z}, \sigma^2) &\geq \mathcal{L}(\mathbf{z}, \sigma^2; \mathbf{y}) \\
&= E_{q(\mathbf{z}, \sigma^2 | \mathbf{y})} [\log p(\mathbf{y} | \mathbf{z}, \sigma^2) p(\mathbf{z}) p(\sigma^2) - \log q(\mathbf{z}, \sigma^2 | \mathbf{y})]. \quad (5)
\end{aligned}$$

28 Similar to the traditional mean-field variation methods, we assumed the independence between  
29 variable  $\mathbf{z}$  and  $\sigma^2$ , i.e.,

$$q(\mathbf{z}, \sigma^2 | \mathbf{y}) = q(\mathbf{z} | \mathbf{y}) q(\sigma^2 | \mathbf{y}). \quad (6)$$

30 Based on the conjugate priors in Eq. 2 and 3, it is natural to formulate variational posterior forms of  
31  $\mathbf{z}$  and  $\sigma^2$  as follows:

$$q(\mathbf{z} | \mathbf{y}) = \prod_i^d \mathcal{N}(z_i | \mu_i(\mathbf{y}; W_D), m_i^2(\mathbf{y}; W_D)), \quad q(\sigma^2 | \mathbf{y}) = \prod_i^d \text{IG}(\sigma_i^2 | \alpha_i(\mathbf{y}; W_S), \beta_i(\mathbf{y}; W_S)), \quad (7)$$

32 where  $\mu_i(\mathbf{y}; W_D)$  and  $m_i^2(\mathbf{y}; W_D)$  are designed as the prediction functions for getting posterior  
33 parameters of latent variable  $\mathbf{z}$  directly from  $\mathbf{y}$ . The function is represented as a network, called  
34 denoising network or *D-Net*, with parameters  $W_D$ . Similarly,  $\alpha_i(\mathbf{y}; W_S)$  and  $\beta_i(\mathbf{y}; W_S)$  denote  
35 the prediction functions for evaluating posterior parameters of  $\sigma^2$  from  $\mathbf{y}$ , where  $W_S$  represents the  
36 parameters of a network, called Sigma network or *S-Net*, for predicting them. Our aim is then to  
37 optimize these two network parameters  $W_D$  and  $W_S$  so as to get the explicit functions for predicting  
38 clean image variable  $\mathbf{z}$  as well as noise knowledge  $\sigma^2$  from any test noisy image  $\mathbf{y}$ . A rational  
39 objective function with respect to  $W_D$  and  $W_S$  is thus necessary for using gradient decent strategies  
40 to train both networks.

41 For notation convenience, we simply write  $\mu_i(\mathbf{y}; W_D)$ ,  $m_i^2(\mathbf{y}; W_D)$ ,  $\alpha_i(\mathbf{y}; W_S)$ ,  $\beta_i(\mathbf{y}; W_S)$  as  $\mu_i$ ,  
42  $m_i^2$ ,  $\alpha_i$ ,  $\beta_i$  in the following calculations.

43 Combining Eqs (5), (6) and Eq (7), the lower bound can be rewritten as:

$$\mathcal{L}(\mathbf{z}, \sigma^2; \mathbf{y}) = E_{q(\mathbf{z}, \sigma^2 | \mathbf{y})} [\log p(\mathbf{y} | \mathbf{z}, \sigma^2)] - D_{KL}(q(\mathbf{z} | \mathbf{y}) || p(\mathbf{z})) - D_{KL}(q(\sigma^2 | \mathbf{y}) || p(\sigma^2)), \quad (8)$$

44 Next we calculated the three terms in Eq (8) one by one as follows:

$$\begin{aligned}
E_{q(\mathbf{z}, \boldsymbol{\sigma}^2 | \mathbf{y})} [\log p(\mathbf{y} | \mathbf{z}, \boldsymbol{\sigma}^2)] &= \int q(\mathbf{z}, \boldsymbol{\sigma}^2 | \mathbf{y}) \log p(\mathbf{y} | \mathbf{z}, \boldsymbol{\sigma}^2) d\mathbf{z} d\boldsymbol{\sigma}^2 \\
&= \sum_i^n \int q(z_i, \sigma_i^2 | \mathbf{y}) \log p(y_i | z_i, \sigma_i^2) dz_i d\sigma_i^2 \\
&= \sum_i^n \int q(z_i | \mathbf{y}) q(\sigma_i^2 | \mathbf{y}) \left\{ -\frac{1}{2} \log 2\pi - \frac{1}{2} \log \sigma_i^2 - \frac{(y_i - z_i)^2}{2\sigma_i^2} \right\} dz_i d\sigma_i^2 \\
&= \sum_i^n \left\{ -\frac{1}{2} \log 2\pi - \frac{1}{2} \int q(\sigma_i^2 | \mathbf{y}) \log \sigma_i^2 d\sigma_i^2 \int q(z_i | \mathbf{y}) dz_i \right. \\
&\quad \left. - \frac{1}{2} \int q(z_i | \mathbf{y}) (y_i - z_i)^2 dz_i \int q(\sigma_i^2 | \mathbf{y}) \frac{1}{\sigma_i^2} d\sigma_i^2 \right\} \\
&= \sum_i^n \left\{ -\frac{1}{2} \log 2\pi - \frac{1}{2} E[\log \sigma_i^2] - \frac{1}{2} E[(y_i - z_i)^2] E\left[\frac{1}{\sigma_i^2}\right] \right\} \\
&= \sum_i^n \left\{ -\frac{1}{2} \log 2\pi - \frac{1}{2} (\log \beta_i - \psi(\alpha_i)) - \frac{\alpha_i}{2\beta_i} [(y_i - \mu_i)^2 + m_i^2] \right\}, \tag{9}
\end{aligned}$$

45

$$\begin{aligned}
D_{KL}(q(\mathbf{z} | \mathbf{y}) || p(\mathbf{z})) &= \sum_i^n D_{KL}(\mathcal{N}(z_i | \mu_i, m_i^2) || p(z_i | x_i, \varepsilon_0^2)) \\
&= \sum_i^n \left\{ \frac{(\mu_i - x_i)^2}{2\varepsilon_0^2} + \frac{1}{2} \left[ \frac{m_i^2}{\varepsilon_0^2} - \log \frac{m_i^2}{\varepsilon_0^2} - 1 \right] \right\}, \tag{10}
\end{aligned}$$

46

$$\begin{aligned}
D_{KL}(q(\boldsymbol{\sigma}^2 | \mathbf{y}) || p(\boldsymbol{\sigma}^2)) &= \sum_i^n D_{KL}\left(\text{IG}(\sigma_i^2 | \alpha_i, \beta_i) || \text{IG}\left(\sigma_i^2 | \frac{p^2}{2} - 1, \frac{p^2 \xi_i}{2}\right)\right) \\
&= \sum_i^n \left\{ \left(\alpha_i - \frac{p^2}{2} + 1\right) \psi(\alpha_i) + \left[\log \Gamma\left(\frac{p^2}{2} - 1\right) - \log \Gamma(\alpha_i)\right] \right. \\
&\quad \left. + \left(\frac{p^2}{2} - 1\right) \left(\log \beta_i - \log \frac{p^2 \xi_i}{2}\right) + \alpha_i \left(\frac{p^2 \xi_i}{2\beta_i} - 1\right) \right\}, \tag{11}
\end{aligned}$$

47 Where  $\psi(\cdot)$  denotes the digamma function,  $E[\cdot]$  represents expectation with some stochastic variables  
48 that had been neglected for notation clarity.

49 We can then easily get the expected objective function (i.e., a negative lower bound of the marginal  
50 likelihood on entire training set) for optimizing the network parameters of D-Net and S-Net as follows:

51

$$\min_{W_D, W_S} - \sum_{j=1}^n \mathcal{L}(\mathbf{z}_j, \boldsymbol{\sigma}_j^2; \mathbf{y}_j). \tag{12}$$

## 52 2 More Experimental Results

### 53 2.1 Experiments on Synthetic Non-I.I.D. Gaussian Noise

54 In this supplementary material, we displayed more denoising results of different methods on the  
55 testing dataset in Fig. 1-6.

### 56 2.2 Experiments on Real-World Noise

57 In Fig. 7, we show more denoising results of different methods on the SIDD validation dataset.

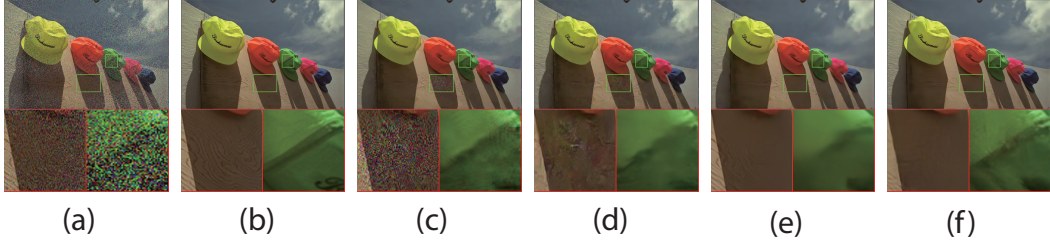

Figure 1: Image denoising results of different methods on the testing data in Case 1. From left to right: (a) Noisy Image, (b) Groundtruth, (c) CBM3D, (d) DnCNN-B, (e) FFDNet, (f) VDN

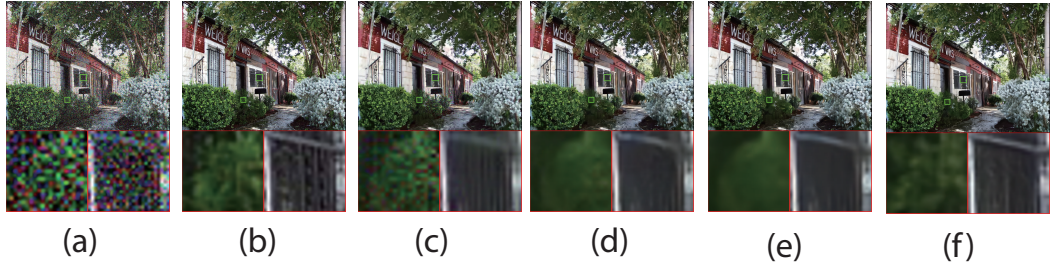

Figure 2: Image denoising results of different methods on the testing data in Case 1. From left to right: (a) Noisy Image, (b) Groundtruth, (c) CBM3D, (d) DnCNN-B, (e) FFDNet, (f) VDN

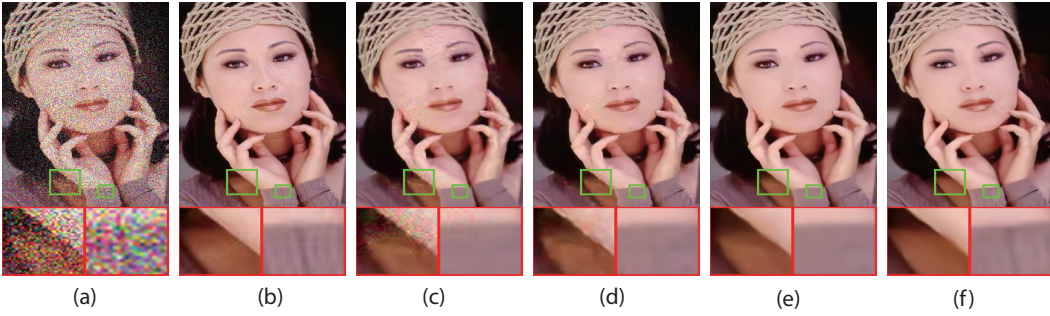

Figure 3: Image denoising results of different methods on the testing data in Case 2. From left to right: (a) Noisy Image, (b) Groundtruth, (c) CBM3D, (d) DnCNN-B, (e) FFDNet, (f) VDN

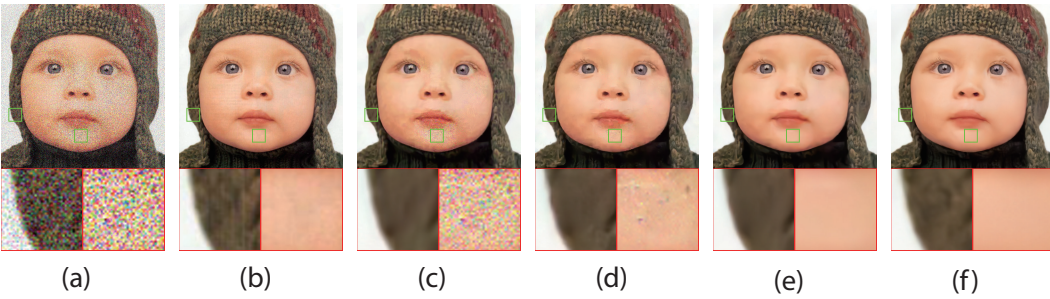

Figure 4: Image denoising results of different methods on the testing data in Case 2. From left to right: (a) Noisy Image, (b) Groundtruth, (c) CBM3D, (d) DnCNN-B, (e) FFDNet, (f) VDN

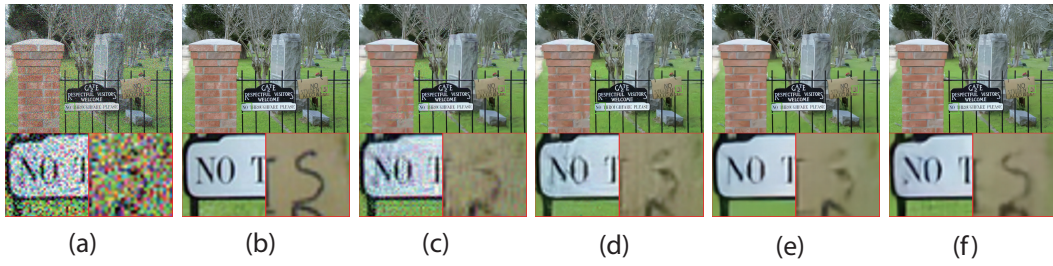

Figure 5: Image denoising results of different methods on the testing data in Case 3. From left to right: (a) Noisy Image, (b) Groundtruth, (c) CBM3D, (d) DnCNN-B, (e) FFDNet, (f) VDN

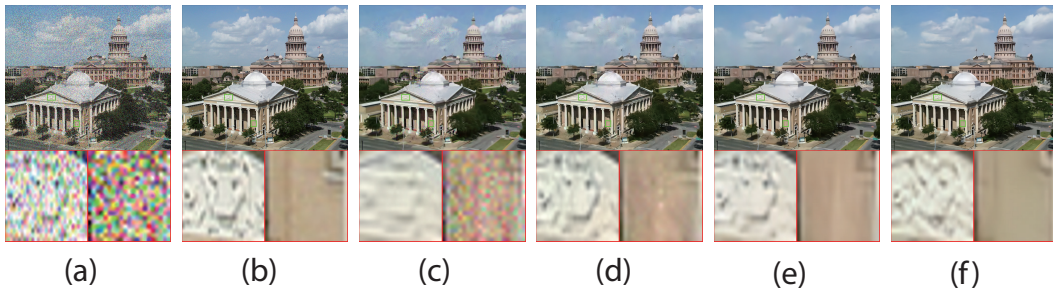

Figure 6: Image denoising results of different methods on the testing data in Case 3. From left to right: (a) Noisy Image, (b) Groundtruth, (c) CBM3D, (d) DnCNN-B, (e) FFDNet, (f) VDN

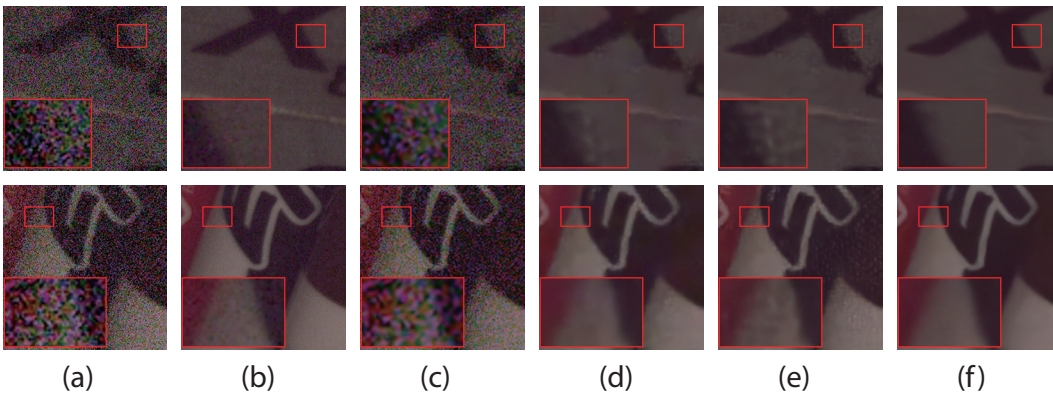

Figure 7: Image denoising results of different methods on the SIDD validation set. From left to right: (a) Noisy image, (b) Simulated "clean" image, (c) WNNM, (d) DnCNN-B, (e) CBDNet, (f) VDN
